# Supplementary material for: Structural confinement-induced highly efficient deep-red emission and negative thermal quenching performance in Mn4+-activated Ca7Mg2Ga6−yAlyO18:Mn4+ phosphors
Source: Royal Society of Chemistry journal article supplement (doi:10.1039/d3qi00252g), 2023-01-01
Supplement: d3qi00252g1.pdf [file d3qi00252g1.pdf]

# Structural confinement-induced highly efficient deep-red emission and negative thermal quenching performances in $\text{Mn}^{4+}$ -activated $\text{Ca}_7\text{Mg}_2\text{Ga}_{6-y}\text{Al}_y\text{O}_{18}:\text{Mn}^{4+}$ phosphors

Jinmei Huang,<sup>a</sup> Pengfei Jiang,<sup>\*a</sup> Zien Cheng,<sup>a</sup> Rong Wang,<sup>b</sup> Rihong Cong,<sup>a</sup> Tao Yang<sup>\*a</sup>

<sup>a</sup> College of Chemistry and Chemical Engineering, Chongqing University, Chongqing 401131, China

<sup>b</sup> School of Metallurgy and Materials Engineering, Chongqing University of Science & Technology, Chongqing 401331, P. R. China

\* Corresponding authors: pengfeijiang@cqu.edu.cn; taoyang@cqu.edu.cn.

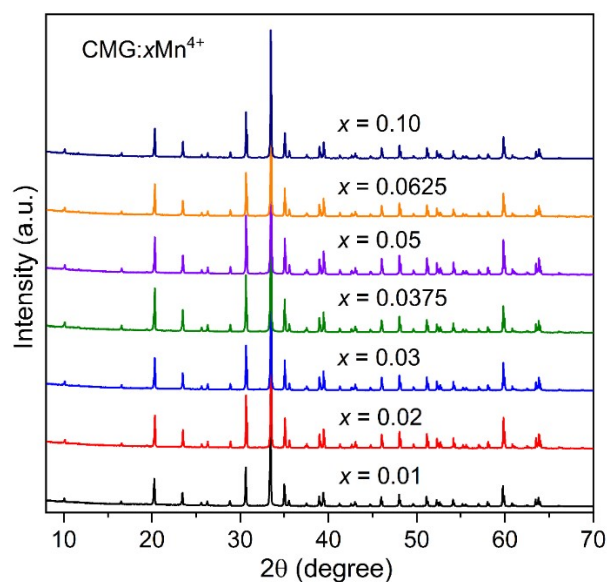

**Fig. S1** XPRD patterns for CMGO:  $x\text{Mn}^{4+}$  ( $x = 0.01, 0.02, 0.03, 0.0375, 0.05, 0.0625, \text{ and } 0.10$ ).

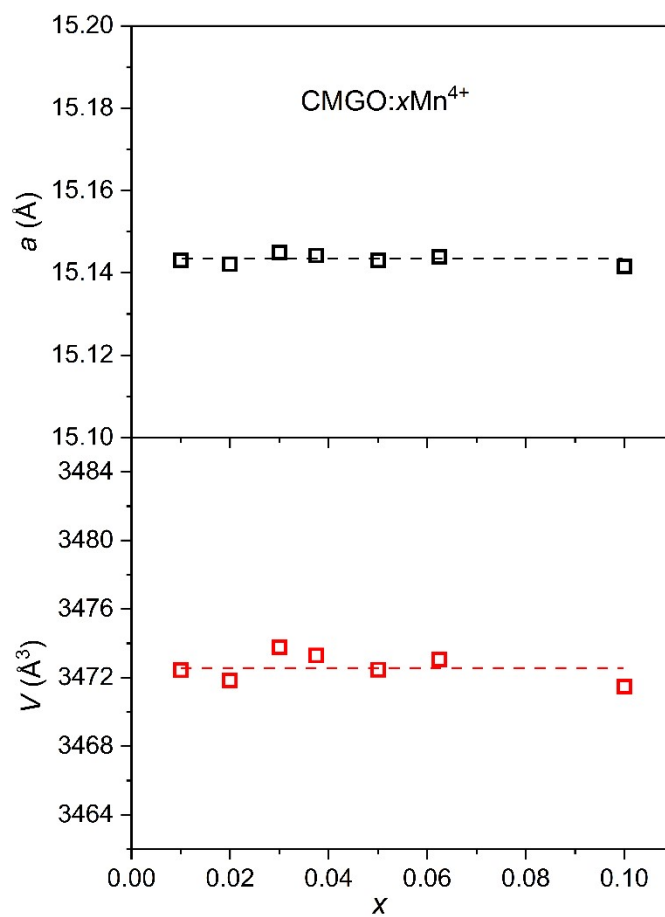

**Fig. S2** Plots of lattice parameters along with  $\text{Mn}^{4+}$ -content ( $x$ ) in CMGO:  $x\text{Mn}^{4+}$ .

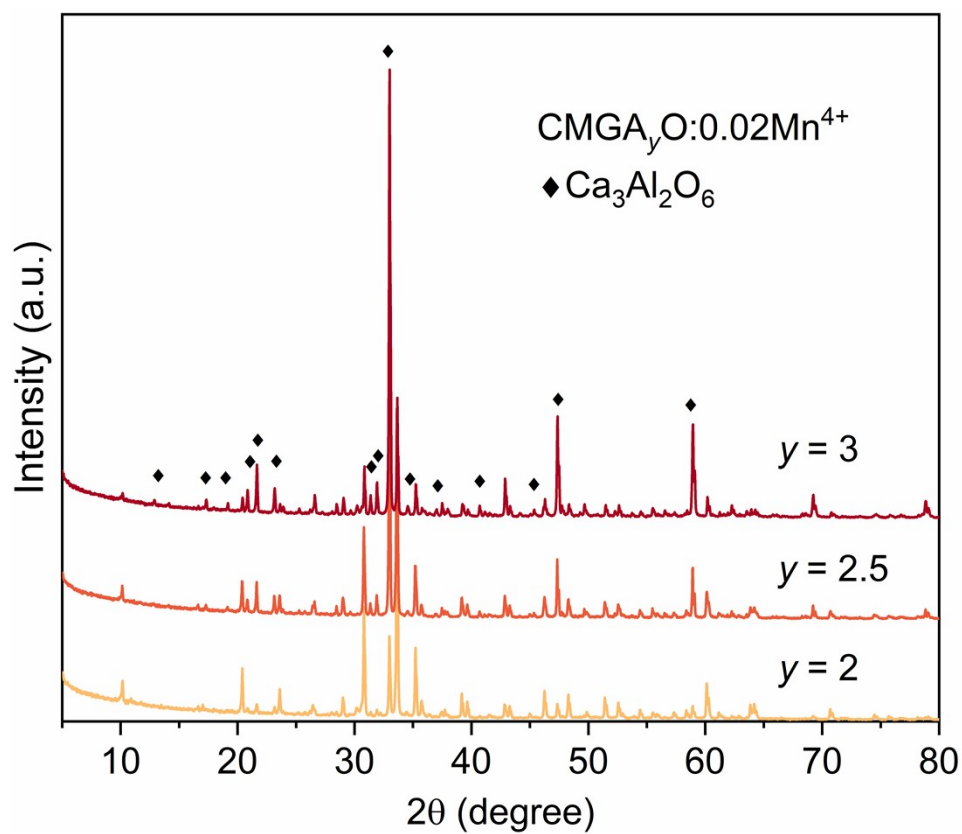

**Fig. S3** PXRd patterns for CMGA<sub>y</sub>O:0.02Mn<sup>4+</sup> with  $y = 2, 2.5,$  and  $3$ . The black diamonds represent the diffraction peaks corresponding to the impurity phase Ca<sub>3</sub>Al<sub>2</sub>O<sub>6</sub>.

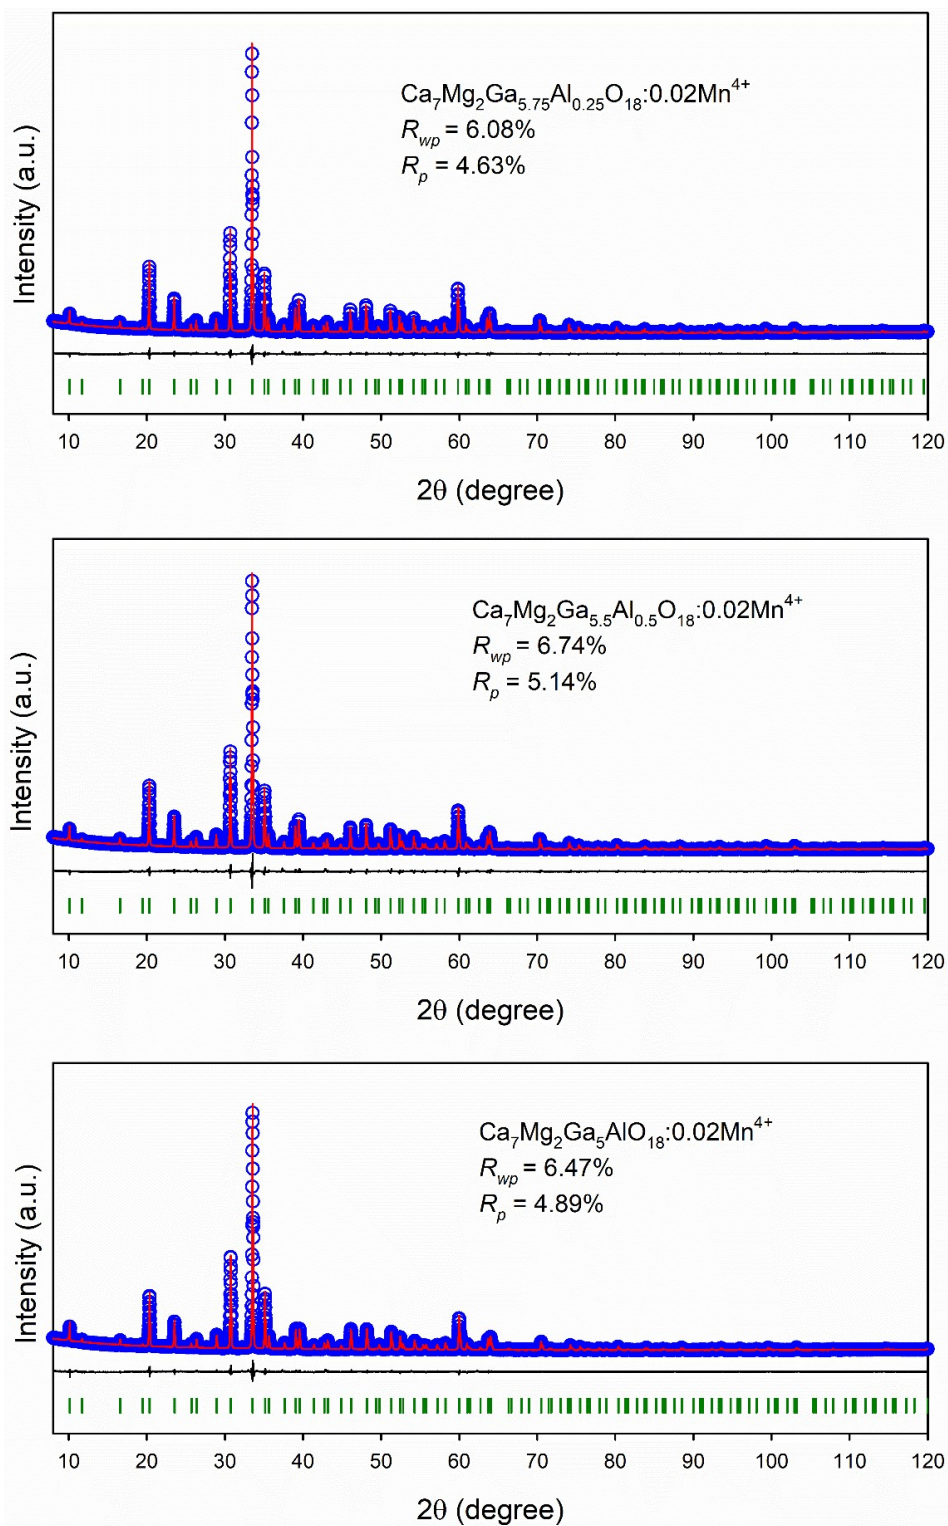

Fig. S4 Rietveld refinement plots of XPRD data for  $\text{CMGA}_y\text{O}:\text{Mn}^{4+}$  ( $y = 0.25, 0.5, \text{ and } 1$ ).

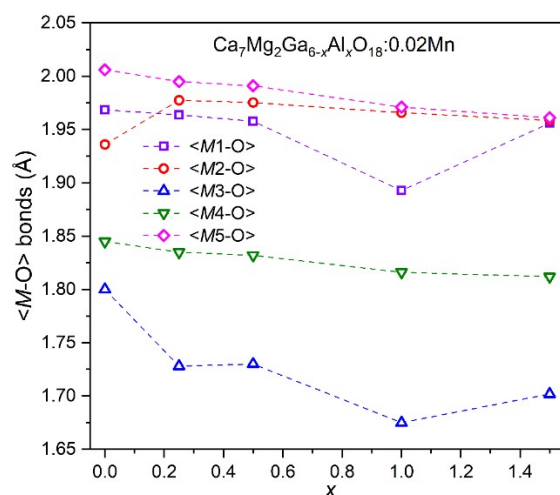

**Fig. S5** Plots of the average metal-oxygen ( $M$ -O) bond lengths along with Al-content ( $y$ ) in  $\text{CMGA}_y\text{O}:\text{Mn}^{4+}$  ( $y = 0, 0.25, 0.5, 1, \text{ and } 1.5$ ).

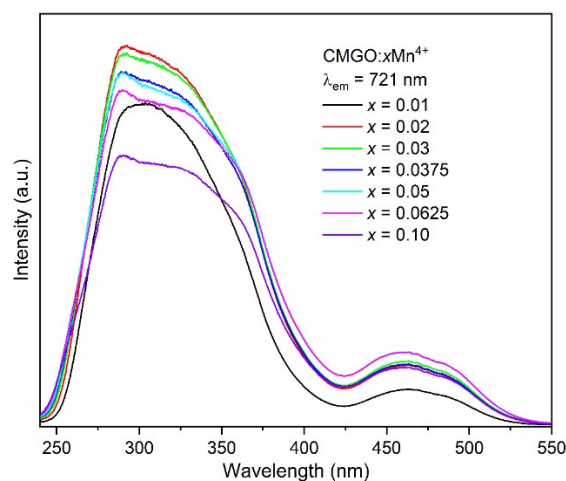

**Fig. S6** The PLE spectra of  $\text{CMGO}:\text{xMn}^{4+}$  ( $x = 0.01, 0.02, 0.03, 0.0375, 0.05, 0.0625, \text{ and } 0.10$ ).

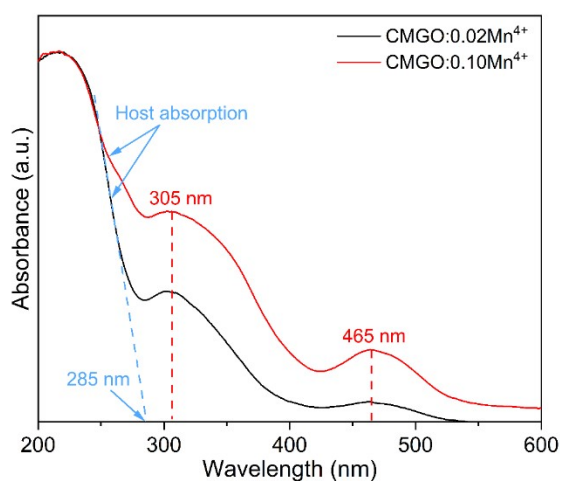

**Fig. S7** The UV-visible light diffuse reflectance spectra for  $\text{CMGO}:\text{xMn}^{4+}$  ( $x = 0.02 \text{ and } 0.10$ ).

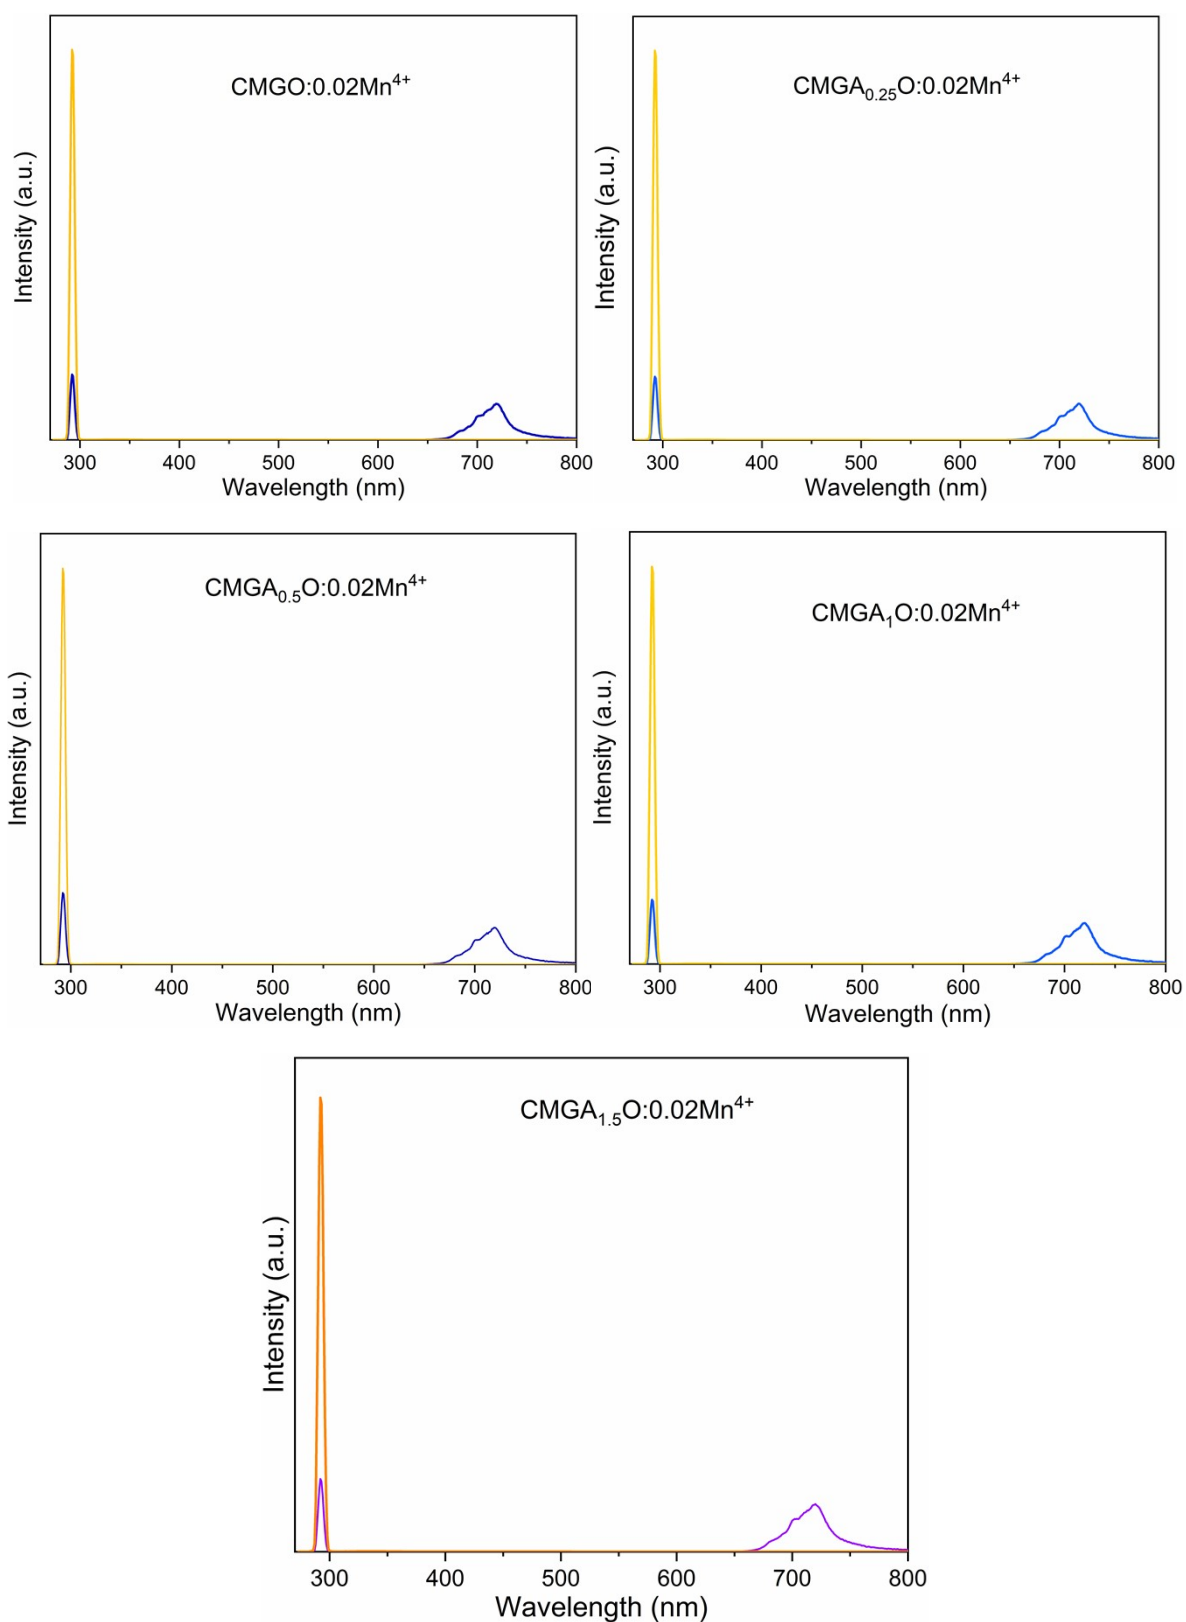

**Fig. S8** The optical spectra of  $\text{CMGA}_y\text{O}:0.02\text{Mn}^{4+}$  phosphors recorded by the quantum efficiency system under the excitation wavelength of 293 nm. The yellow lines in the figures represent the reflectance of the  $\text{BaSO}_4$  standard.

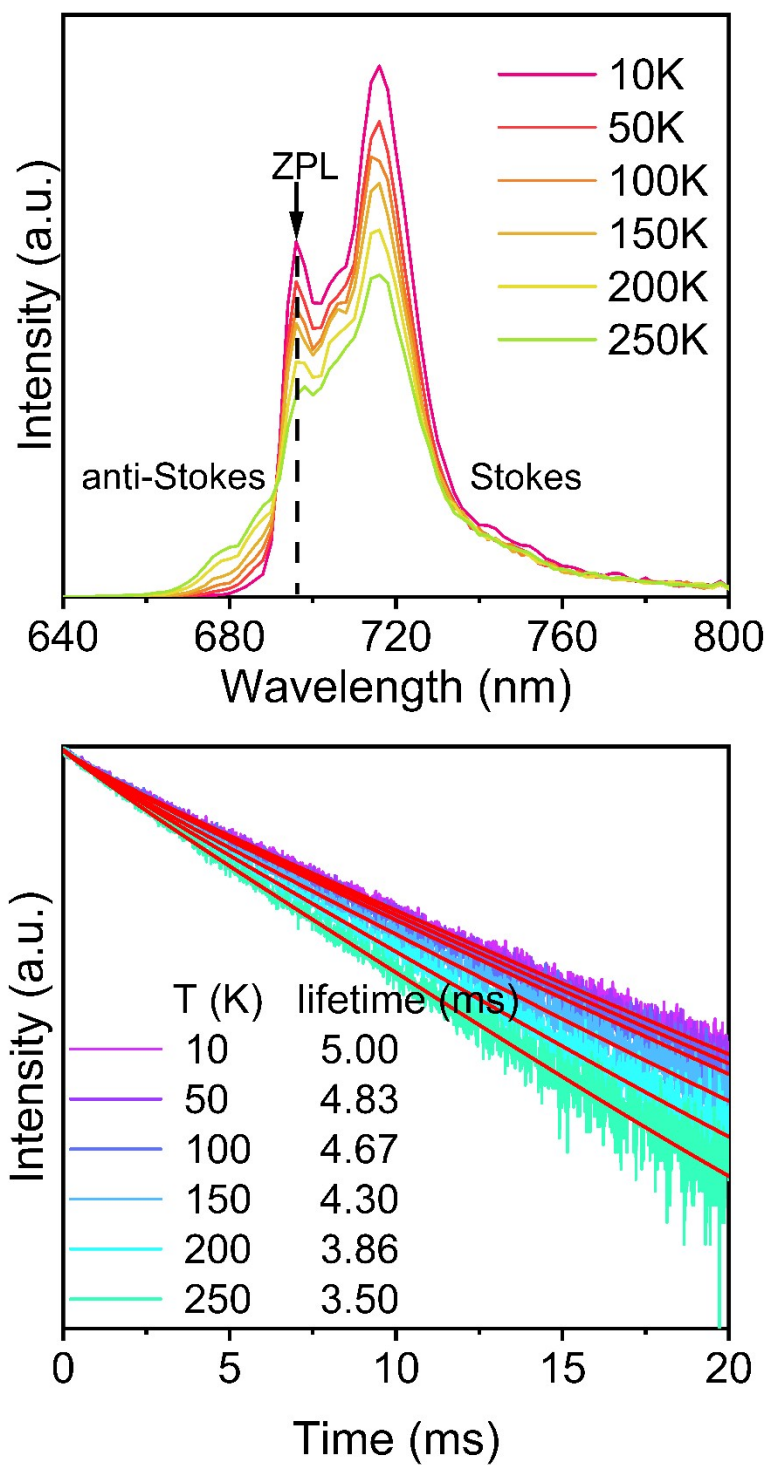

**Fig. S9** Temperature-dependent PL spectra (up panel) and decay curves (down panel) of CMGO:0.02Mn<sup>4+</sup> recorded at 10, 50, 100, 150, 200, and 250 K.

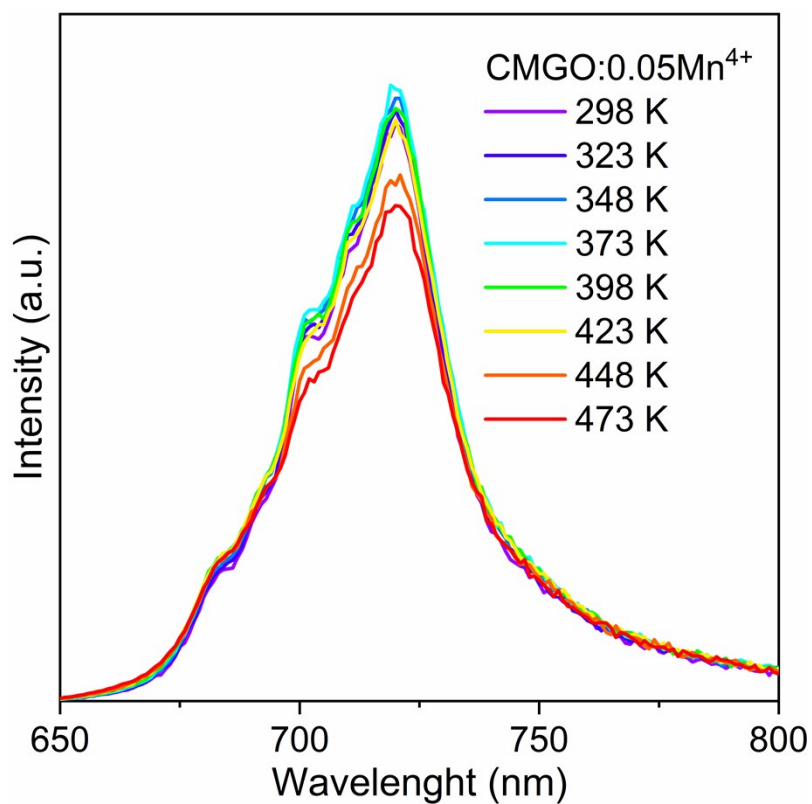

**Fig. S10** Temperature-dependent PL spectra of CMGO:0.05Mn<sup>4+</sup>.

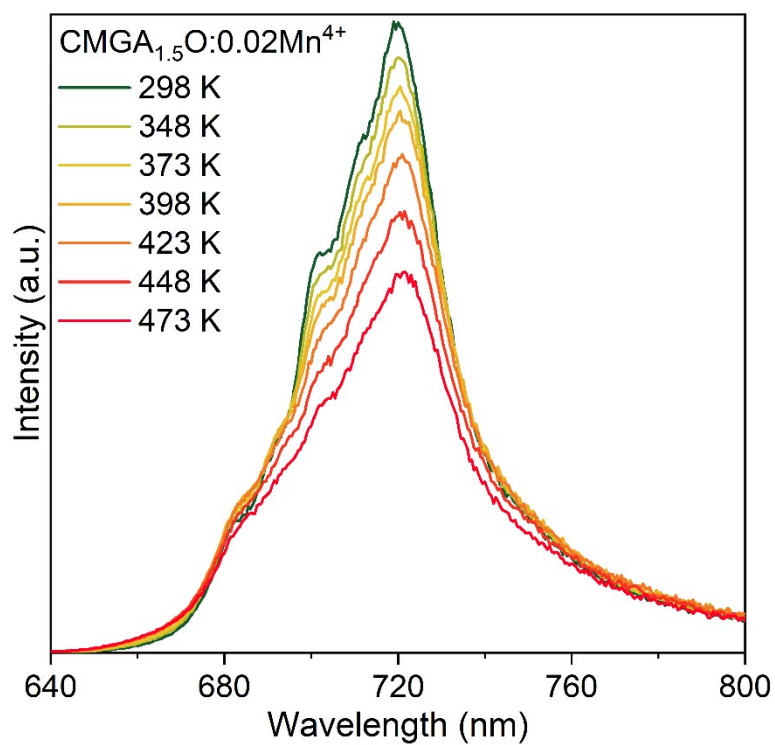

**Fig. S11** Temperature-dependent PL spectra of CMGA<sub>1.5</sub>O:0.02Mn<sup>4+</sup>.



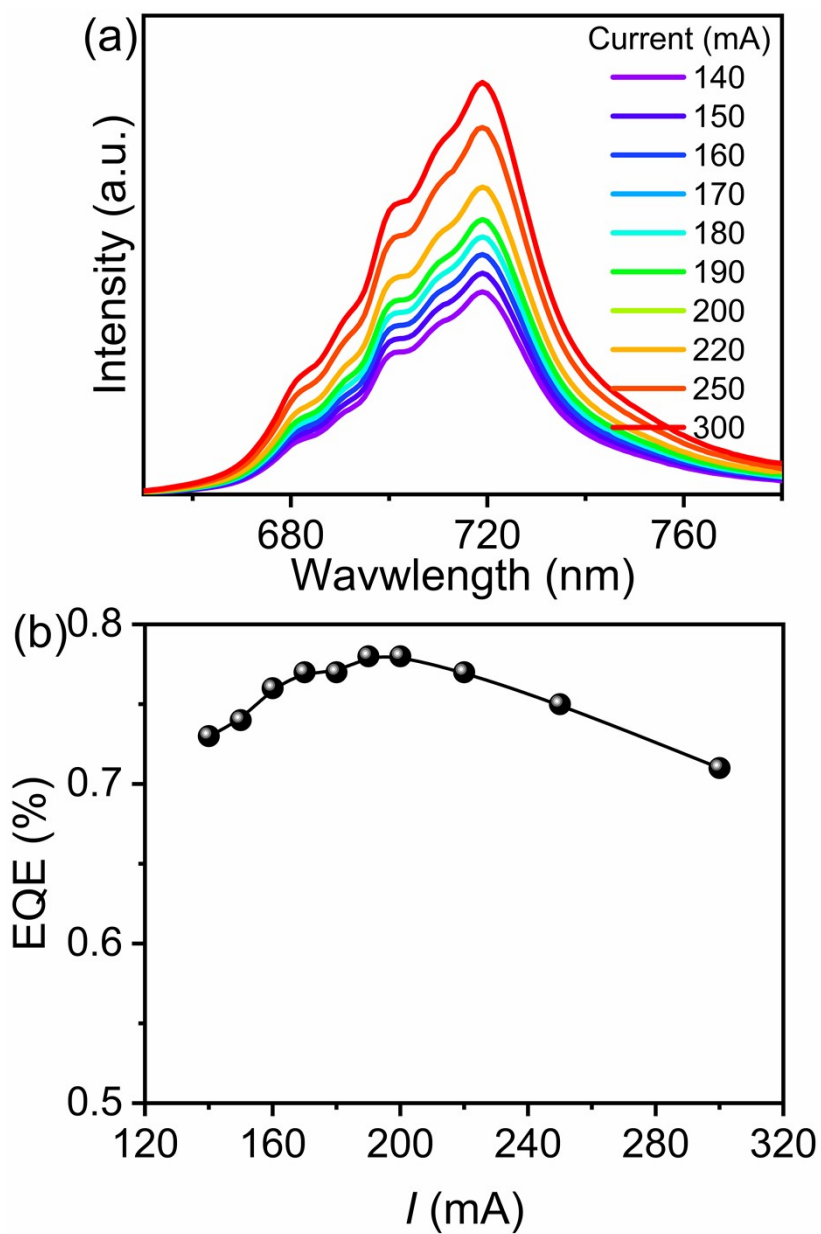

**Fig. S12** Electroluminescence spectra (a) and measured EQE values (b) for the pc-LED fabricated by the combination of a 310 nm UV-chip and deep-red emitting phosphor  $\text{CMGA}_{1.5}\text{O}:\text{Mn}^{4+}$  under various driven currents.

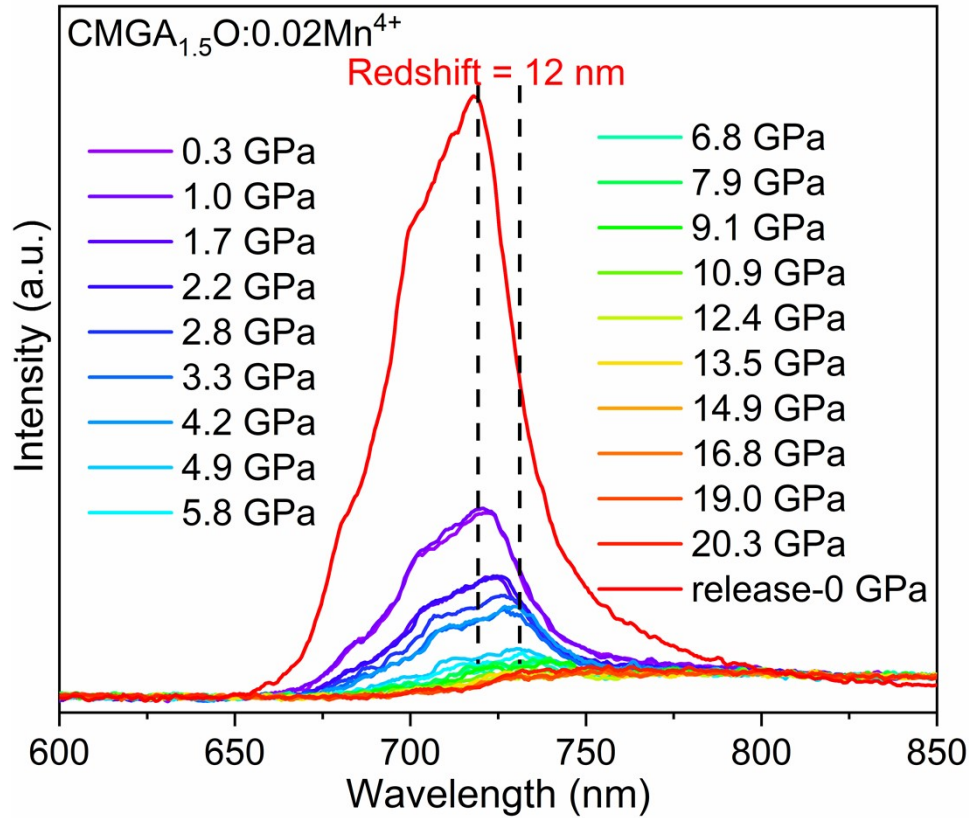

**Fig. S13** The emission spectra ( $\lambda_{\text{ex}} = 375 \text{ nm}$ ) of  $\text{CMGA}_{1.5}\text{O}:0.02\text{Mn}^{4+}$  at different pressures.

**Table S1** Fitted values for  $h\nu_s$ ,  $a_1$ ,  $\Delta E_1$ ,  $a_2$ , and  $\Delta E_2$ .

| Phosphors                                  | $h\nu_s$ (meV) | $a_1$ | $\Delta E_1$ (meV) | $a_2$              | $\Delta E_2$ (eV) |
|--------------------------------------------|----------------|-------|--------------------|--------------------|-------------------|
| $\text{CMGO}:0.02\text{Mn}^{4+}$           | 73.5           | 3.83  | 92.7               | $1.20 \times 10^6$ | 0.66              |
| $\text{CMGO}:0.05\text{Mn}^{4+}$           | 73.8           | 1.59  | 72.3               | $1.20 \times 10^6$ | 0.63              |
| $\text{CMA}_{0.5}\text{GO}:\text{Mn}^{4+}$ | 73.8           | 2.07  | 73.8               | —#                 | —#                |
| $\text{CMA}_{1.5}\text{GO}:\text{Mn}^{4+}$ | 73.6           | 3.82  | 88.1               | $1.14 \times 10^6$ | 0.59              |

# The “—” signs indicate these exponents are unnecessary in the mathematical fitting.
